# Supplementary material for: Trans-11-(3,4-Dimethoxyphenyl)-2,3,8,9-tetramethoxy-6-oxo-11,12-dihydro-6H-dibenzo[c,h]chromene-12-carboxylic Acid
Source: Preprints.org preprint supplement (doi:10.20944/preprints202411.0304.v1), 2024-11-05
Supplement: Supplementary file 1 [file supplementary]

**Supplementary Material**

*trans*-11-(3,4-dimethoxyphenyl)-2,3,8,9-tetramethoxy-6-oxo-11,12-dihydro-6*H*-dibenzo[*c,h*]chromene-12-carboxylic acid

**Victor Angelov, Savina Stoyanova and Milen Bogdanov**

**Content:**

**Figure S1 1H-NMR Spectrum of Compound 4 in DMSO-d6**

**Figure S1a 1H-NMR Spectrum of Compound 4 in DMSO-d6**

**Figure S2 13C-NMR Spectrum of Compound 4 in DMSO-d6**

**Figure S3 DEPT-135-NMR Spectrum of Compound 4 in DMSO-d6**

**Figure S4 HRMS Spectrum of Compound 4**

**
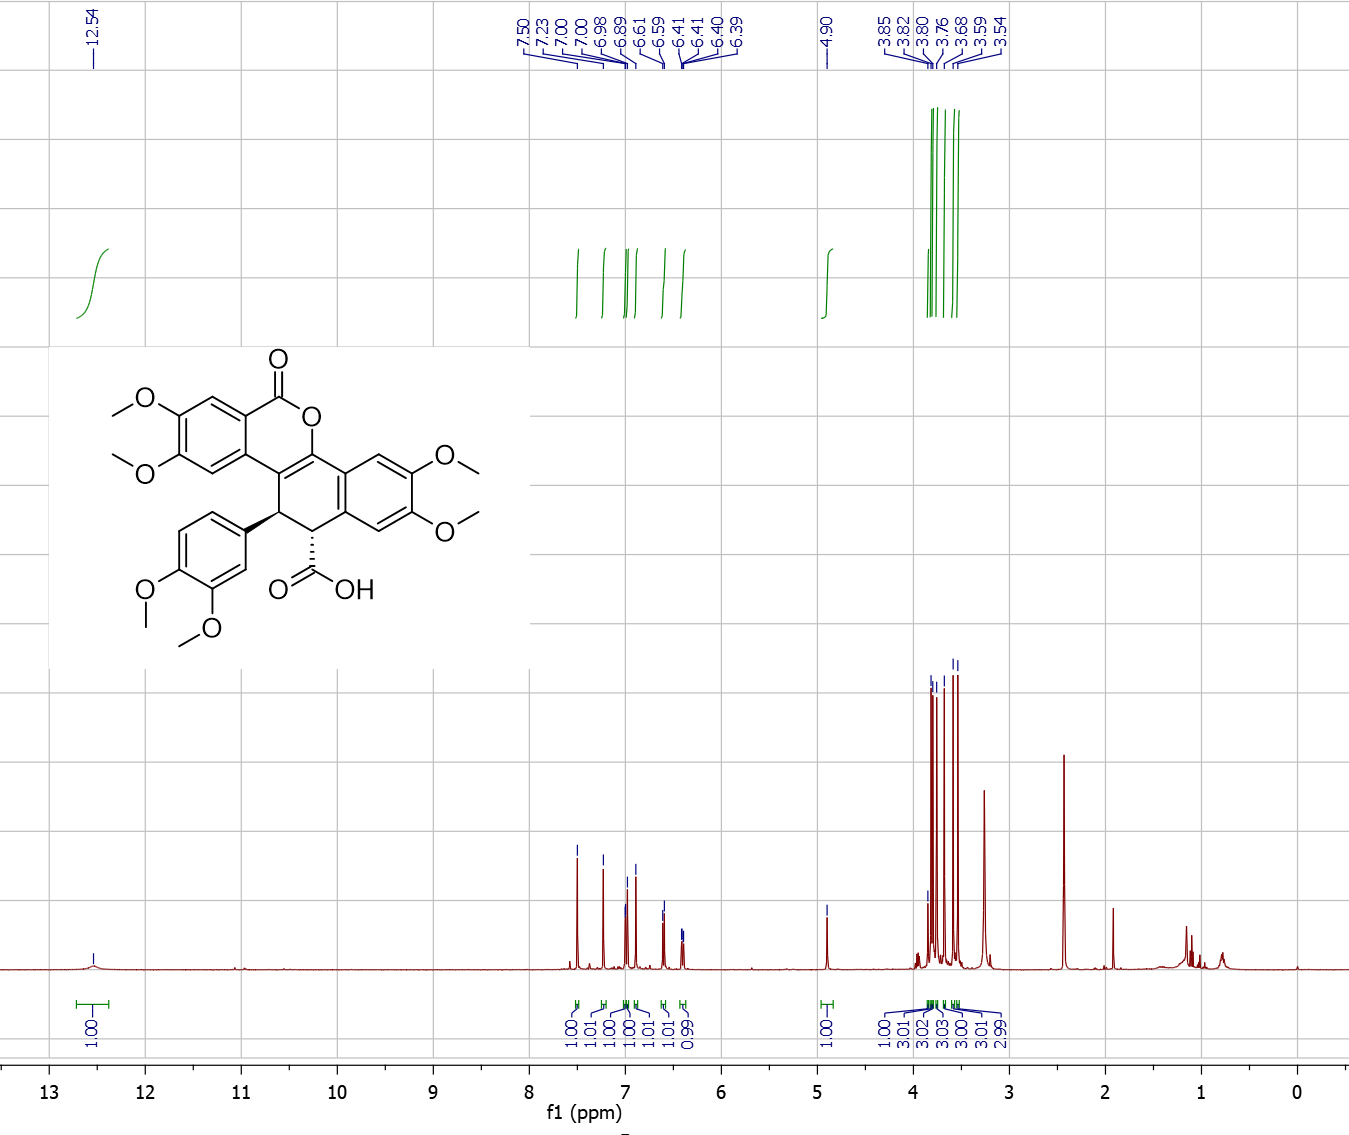
**

**Figure S1 1H Spectrum of Compound 4 in DMSO-d6 ***

*Some solvent residual peaks might be visible


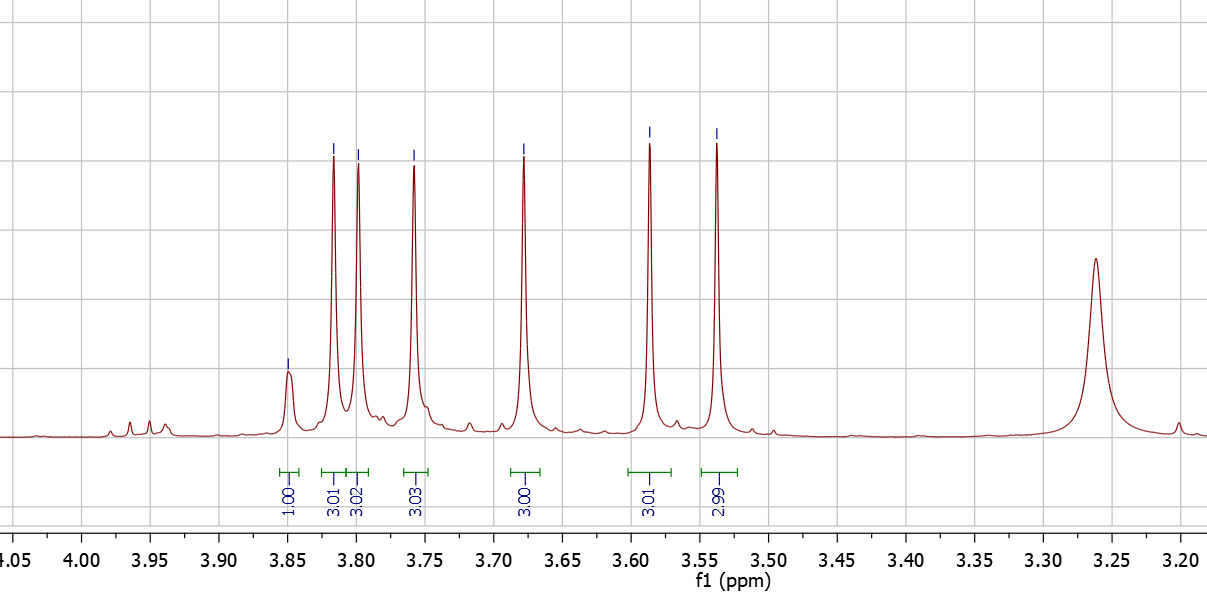


**Figure S1a 1H Spectrum of Compound 4 in DMSO-d6**


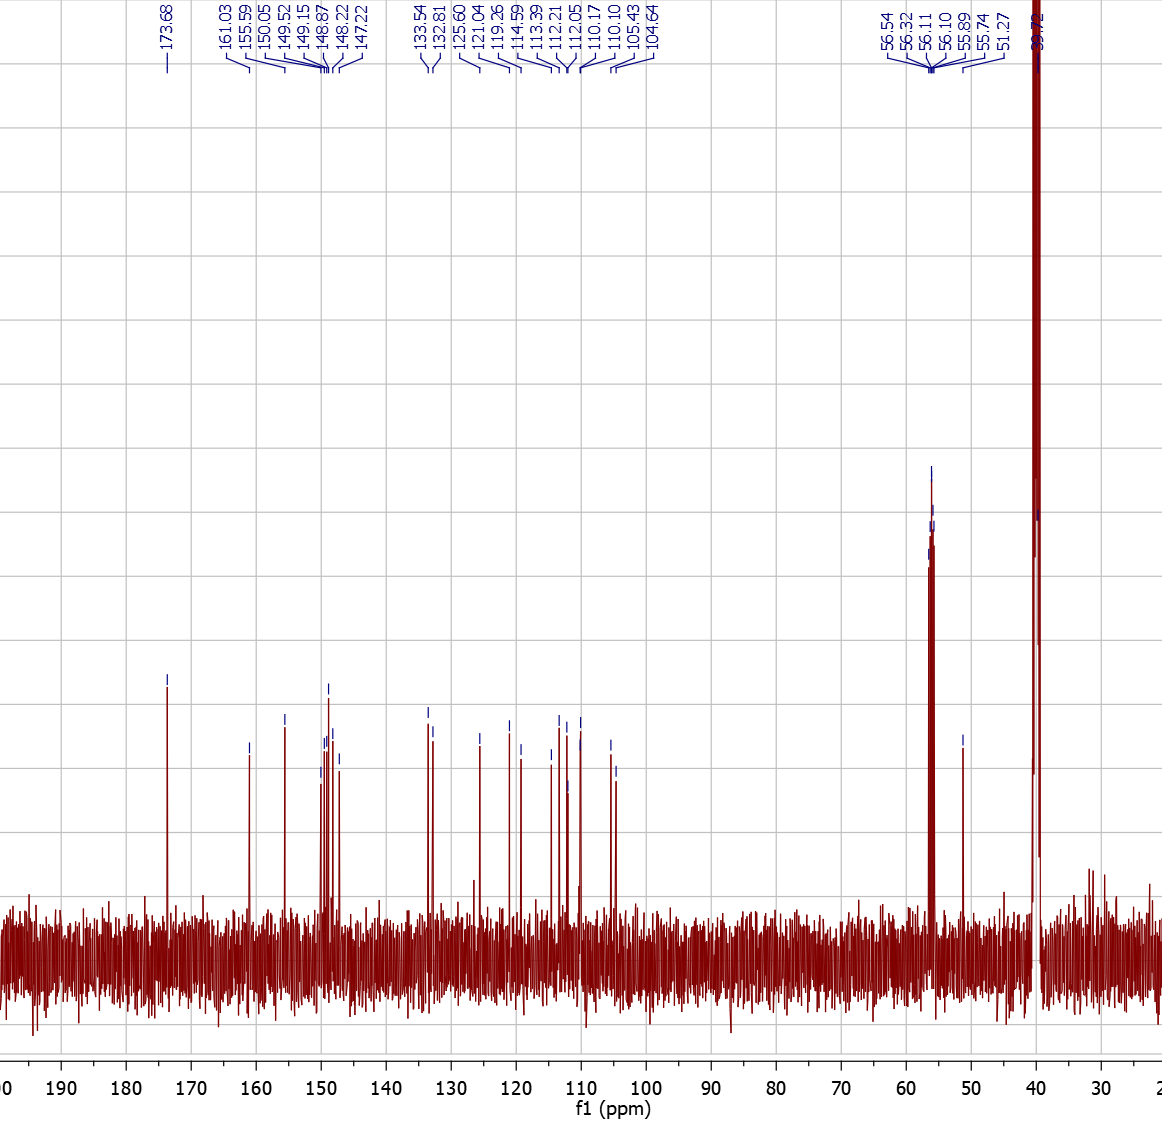


**Figure S2 13C-NMR Spectrum of Compound 4 in DMSO-d6 ****

** Note the 30th Carbon is in the solvent residual peak, which is more visible on the DEPT-135 Spectrum (**Figure S3**)


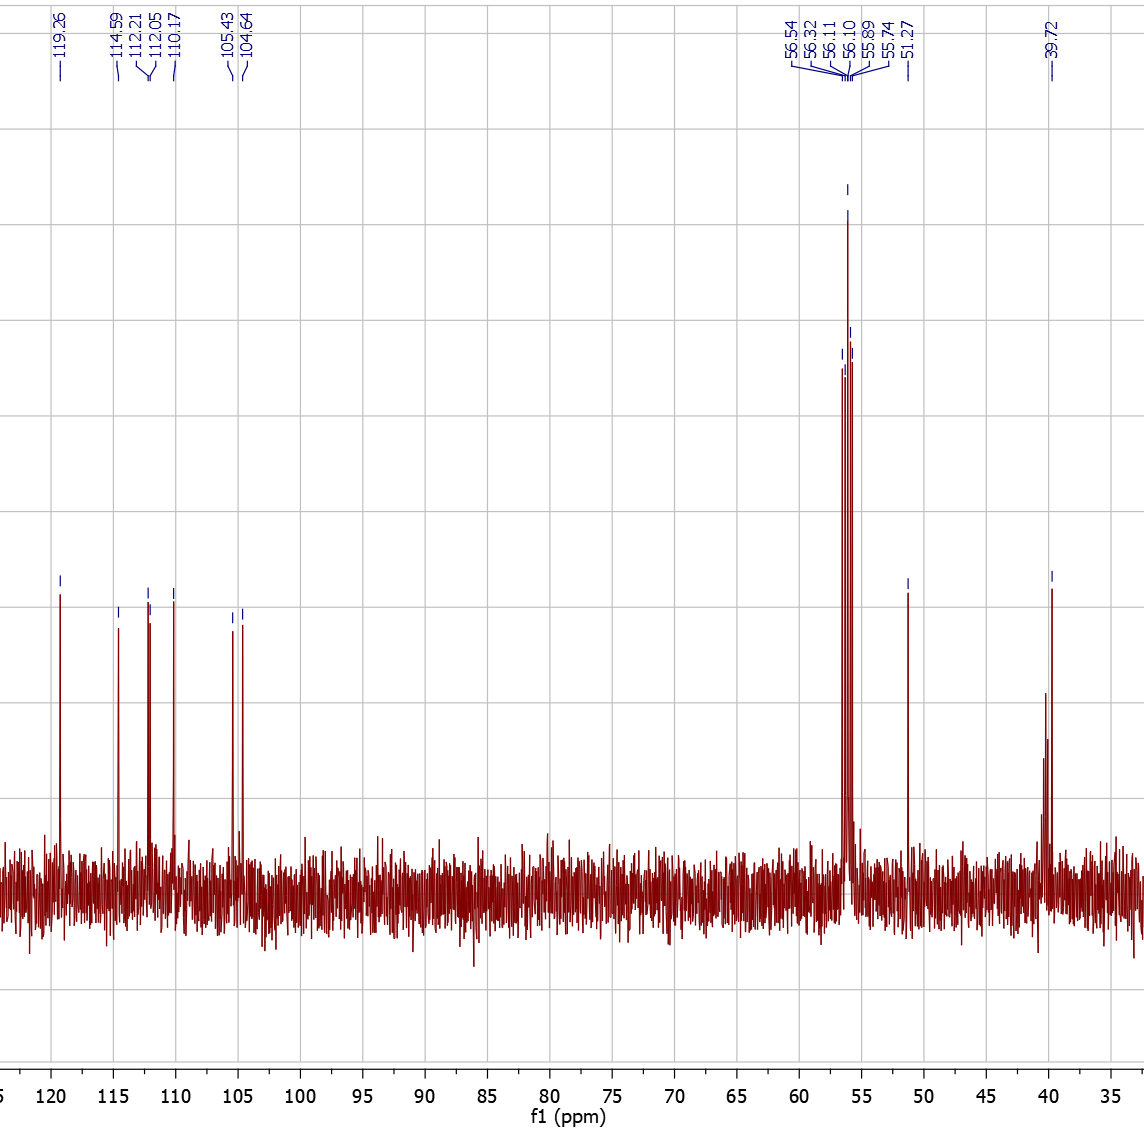


**Figure S3 DEPT-135-NMR Spectrum of Compound 4 in DMSO-d6**

**
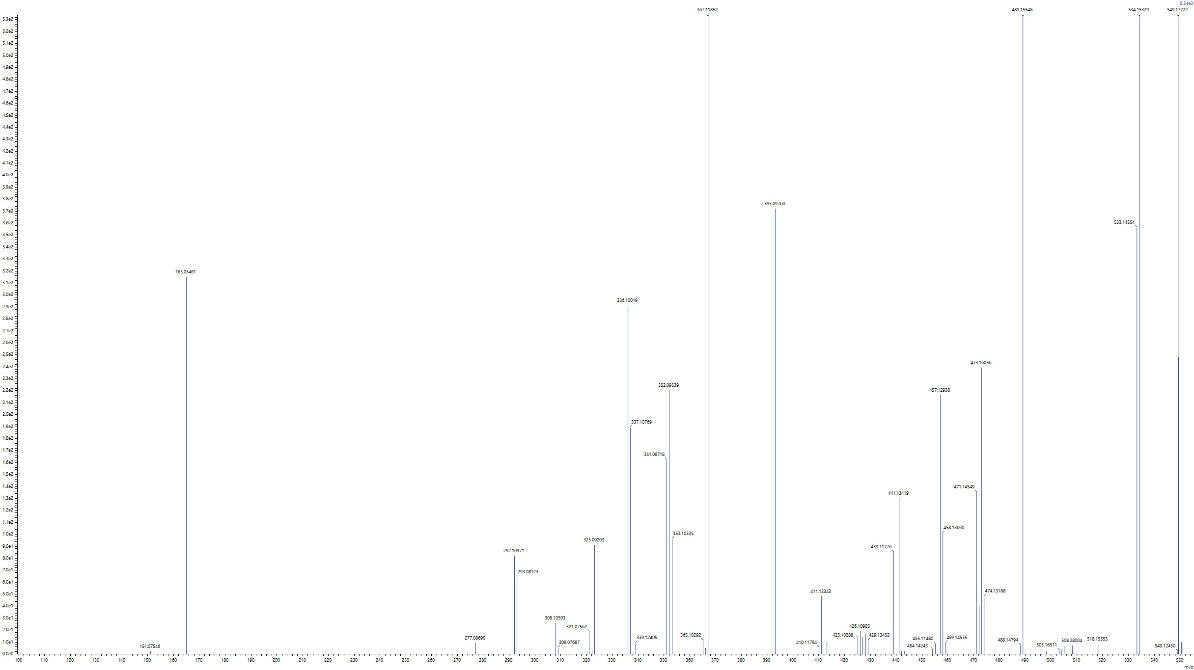
**

**Figure S4 HRMS-ESI Spectrum of Compound 4**
